# Supplementary material
Source: publisher site journal article supplement (https://www.spandidos-publications.com/1678/downloadSupplementary)
Supplement: Supplementary file 1 [file downloadSupplementary]

## Sheet: Table S1
Table SI. A full list of all known sRNAs that passed filter on normality with Shapiro-Wilk (p > 0.95)
Gene ID	Accession	Entrez ID	Ensembl ID	Gene Type	DB Refs
MI0015995	hsa-mir-3605	100500853		miRNA	miRBase:MI0015995
MI0000483	hsa-mir-186	406962		miRNA	miRBase:MI0000483
chr1.trna35	trna35			tRNA
chr1.trna37	trna37			tRNA
chr1.trna39	trna39			tRNA
chr1.trna41	trna41			tRNA
chr1.trna68	trna68			tRNA
MI0000291	hsa-mir-215	406997	ENSG00000207590	miRNA	miRBase:MI0000291
MI0017308	hsa-mir-4677	100616343		miRNA	miRBase:MI0017308
chr2.trna3	trna3			tRNA
MI0000267	hsa-mir-10b	406903	ENSG00000207744	miRNA	miRBase:MI0000267|RFAM:RF00104
ENSG00000241885	TRNAE40P		ENSG00000241885	tRNA_pseudogene	RFAM:RF00005
chr2.trna17	trna17			tRNA
ENSG00000222345	SNORD19		ENSG00000222345	snoRNA	RFAM:RF00569
ENSG00000222627	RNU2-37P		ENSG00000222627	snRNA	RFAM:RF00004
MI0003583	hsa-mir-576	693161		miRNA	miRBase:MI0003583
ENSG00000239286	AC109927.1		ENSG00000239286	scRNA_pseudogene
MI0000786	hsa-mir-378a	494327		miRNA	miRBase:MI0000786
chr6.trna62	trna62			tRNA
chr6.trna65	trna65			tRNA
ENSG00000221500	SNORD100	594838	ENSG00000221500	snoRNA	RFAM:RF00609
MI0001150	hsa-mir-196b	442920	ENSG00000207584	miRNA	miRBase:MI0001150
MI0003600	hsa-mir-550a-1	693133		miRNA	miRBase:MI0003600
MI0003601	hsa-mir-550a-2	693134	ENSG00000207573	miRNA	miRBase:MI0003601
MI0003602	hsa-mir-590	693175		miRNA	miRBase:MI0003602
MI0000272	hsa-mir-182	406958	ENSG00000207990	miRNA	miRBase:MI0000272
MI0003610	hsa-mir-598	693183		miRNA	miRBase:MI0003610
MI0000542	hsa-mir-320a	407037	ENSG00000208037	miRNA	miRBase:MI0000542
MI0002470	hsa-mir-486	619554		miRNA	miRBase:MI0002470
MI0000439	hsa-mir-23b	407011		miRNA	miRBase:MI0000439
MI0014181	hsa-mir-3074	100422842	ENSG00000207617	miRNA	miRBase:MI0014181
MI0016747	hsa-mir-1254-2	100616217	ENSG00000264574	miRNA	miRBase:MI0016747
MI0006388	hsa-mir-1254-1	100302273		miRNA	miRBase:MI0006388
MI0003129	hsa-mir-146b	574447	ENSG00000202569	miRNA	miRBase:MI0003129
MI0006444	hsa-mir-1307	100302174	ENSG00000221767	miRNA	miRBase:MI0006444
MI0010629	hsa-mir-2110	100302224	ENSG00000238742	miRNA	miRBase:MI0010629
ENSG00000201279	Y_RNA		ENSG00000201279	scRNA	RFAM:RF00019
ENSG00000200615	Y_RNA		ENSG00000200615	scRNA	RFAM:RF00019
chr11.trna12	trna12			tRNA
ENSG00000202314	SNORD6	692075	ENSG00000202314	snoRNA	RFAM:RF00342
MI0000061	hsa-let-7a-2	406882	ENSG00000198975	miRNA	miRBase:MI0000061|RFAM:RF00027
MI0000102	hsa-mir-100	406892	ENSG00000207994	miRNA	miRBase:MI0000102|RFAM:RF00104
MI0000812	hsa-mir-331	442903	ENSG00000199172	miRNA	miRBase:MI0000812
MI0000071	hsa-mir-17	406952	ENSG00000215417	miRNA	miRBase:MI0000071|RFAM:RF00051
MI0000072	hsa-mir-18a	406953		miRNA	miRBase:MI0000072
chr14.trna13	trna13			tRNA
MI0000825	hsa-mir-345	442910	ENSG00000198984	miRNA	miRBase:MI0000825
ENSG00000199214	Y_RNA		ENSG00000199214	scRNA	RFAM:RF00019
chr15.trna11	trna11			tRNA
chr15.trna2	trna2			tRNA
MI0014210	hsa-mir-3176	100423037		miRNA	miRBase:MI0014210
chr16.trna34	trna34			tRNA
chr16.trna6	trna6			tRNA
chr16.trna10	trna10			tRNA
chr16.trna12	trna12			tRNA
chr16.trna27	trna27			tRNA
ENSG00000199949	Y_RNA		ENSG00000199949	scRNA	RFAM:RF00019
chr17.trna7	trna7			tRNA
chr17.trna37	trna37			tRNA
MI0000460	hsa-mir-144	406936	ENSG00000264066	miRNA	miRBase:MI0000460
MI0001445	hsa-mir-423	494335		miRNA	miRBase:MI0001445
MI0000745	hsa-mir-301a	407027		miRNA	miRBase:MI0000745
MI0000077	hsa-mir-21	406991	ENSG00000199004	miRNA	miRBase:MI0000077
MI0000079	hsa-mir-23a	407010	ENSG00000207980	miRNA	miRBase:MI0000079
MI0003656	hsa-mir-641	693226	ENSG00000207631	miRNA	miRBase:MI0003656
MI0000746	hsa-mir-99b	407056	ENSG00000207550	miRNA	miRBase:MI0000746
ENSG00000251806	SNORD119	100113378	ENSG00000251806	snoRNA	RFAM:RF00570
ENSG00000221116	SNORD110	692213	ENSG00000221116	snoRNA	RFAM:RF00610
ENSG00000212232	SNORD17	692086	ENSG00000212232	snoRNA	RFAM:RF00567
chr21.trna2	trna2			tRNA
MI0000681	hsa-mir-155	406947	ENSG00000234883	miRNA	miRBase:MI0000681
MI0000748	hsa-mir-130b	406920	ENSG00000207751	miRNA	miRBase:MI0000748
MI0000068	hsa-let-7f-2	406889		miRNA	miRBase:MI0000068|RFAM:RF00027
ENSG00000241049	AL672138.1		ENSG00000241049	scRNA_pseudogene
MI0020364	hsa-mir-6087			miRNA	miRBase:MI0020364
MI0001519	hsa-mir-20b	574032	ENSG00000207710	miRNA	miRBase:MI0001519
